# Supplementary material
Source: PubMed Central journal article supplement (PMC2873147)
Supplement: NIHMS191672-supplement-supplement_1.pdf [file NIHMS191672-supplement-supplement_1.pdf]

## **Supplemental Methods**

### **Primary and secondary antibodies**

Primary antibodies used in this study include (I) rabbit polyclonal antibodies: anti-alpha smooth muscle actin ( $\alpha$ SMA; ab5694 (1:400); abcam, Cambridge, MA, [www.abcam.com](http://www.abcam.com)); anti-GFP (sc-8334 (1:100); Santa Cruz Biotechnology, Inc., Santa Cruz, CA, [www.scbt.com/](http://www.scbt.com/)); anti-Troponin C (sc-48347 (1:50); Santa Cruz); anti-Von Willebrand Factor (vWF; ab6994 (1:400); abcam); anti-NOS3 (eNOS; sc-654 (1:200); Santa Cruz); (II) mouse monoclonal antibody anti-sarcomeric myosin (MF-20 (1:50); Developmental Studies Hybridoma Bank (DSHB), Iowa City, IA, <http://dshb.biology.uiowa.edu/>); (III) rat monoclonal antibodies: anti-Pecam1 (CD31, 550274 (1:50); BD Pharmingen, San Diego, CA, [www.bdbiosciences.com/pharmingen/](http://www.bdbiosciences.com/pharmingen/)); and anti-Cadherin 5/VE-Cadherin (CD144, 550548 (1:50); BD Pharmingen); as well as (IV) rabbit monoclonal antibodies: anti-calponin (ab46794 (1:200); abcam) and anti-caldesmon (ab32330 (1:250); abcam).

Secondary antibodies included Alexa Fluor 488-, Alexa Fluor 594-, Alexa Fluor 647-conjugated goat-anti mouse IgG (H+L); goat-anti rabbit IgG (H+L); goat-anti rat IgG (H+L) and goat-anti mouse IgM (H+L) (1:250; all from Molecular Probes, Eugene, OR, [probes.invitrogen.com](http://probes.invitrogen.com)).

### **SMC contractility, acetylated low-density lipoprotein (acLDL)-uptake and Matrigel assay**

To assess cell functionality, SMC contractility, uptake of acLDL in EC, and Matrigel EC *in vitro* tube formation were determined. Briefly, cells were subjected to the effect of  $10^{-5}$  M carbachol (C-4382, Sigma-Aldrich Corp., St. Louis, MO, [www.sigma.com](http://www.sigma.com)) in SMGM-2 medium (Lonza, Walkersville, MD, [www.lonza.com](http://www.lonza.com)) for 30 minutes. Contraction was calculated by the difference of cell area at time zero and after 30 minutes using bright-field images. To determine the uptake of acLDL, cells were incubated with 10  $\mu$ g/ml Alexa Fluor 594-labeled acLDL

(Molecular Probes) for 4 hours at 37°C, washed in PBS, fixed with 4% paraformaldehyde (Sigma), counterstained with 4'-6-diamidino-2-phenylindole (DAPI; Sigma) and visualized. For Matrigel assays,  $2.5 \times 10^4$  cells/ 350  $\mu$ l/ well were plated onto Matrigel-coated 24-well plates (BD Biocoat, BD Bioscience Discovery Labware, Bedford, MA, [www.bdbiosciences.com/discoverylabware/](http://www.bdbiosciences.com/discoverylabware/)) and cultured for 24 hours at 37°C, 5% CO<sub>2</sub>. Tube formation was analyzed by phase-contrast microscopy. All imaging was performed using a Zeiss Axiovert 200 microscope (Carl Zeiss MicroImaging Inc., Thornwood, NY, [www.zeiss.com](http://www.zeiss.com)). To serve as controls, primary murine vascular smooth muscle cells (mSMC), isolated from thoracic aortas of C57BL/6 mice, and human umbilical vein endothelial cells (HUVEC), obtained from Lonza, were cultured in either SMGM-2 or EGM-2 media (Lonza).

## **Supplemental Figures**

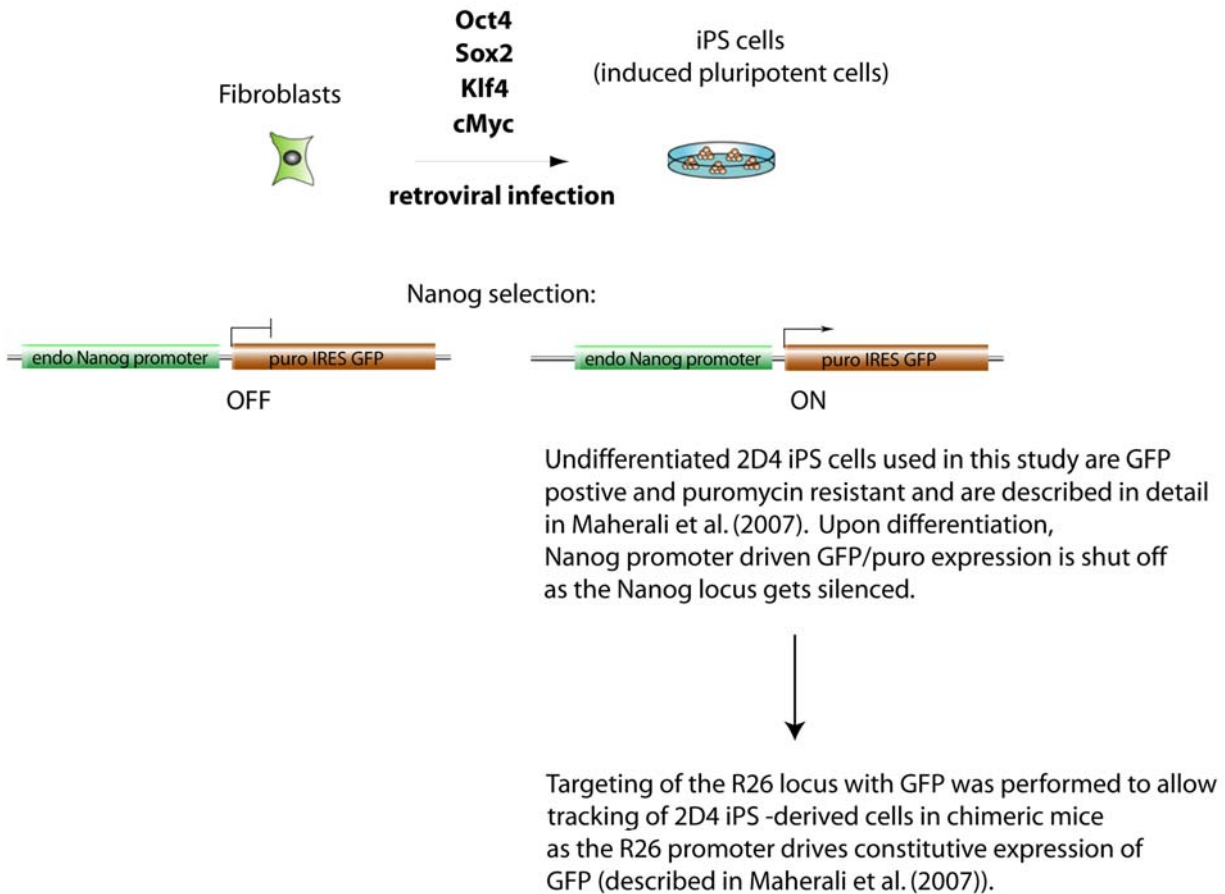

**Suppl. Fig. 1** Generation of 2D4 iPS cells.

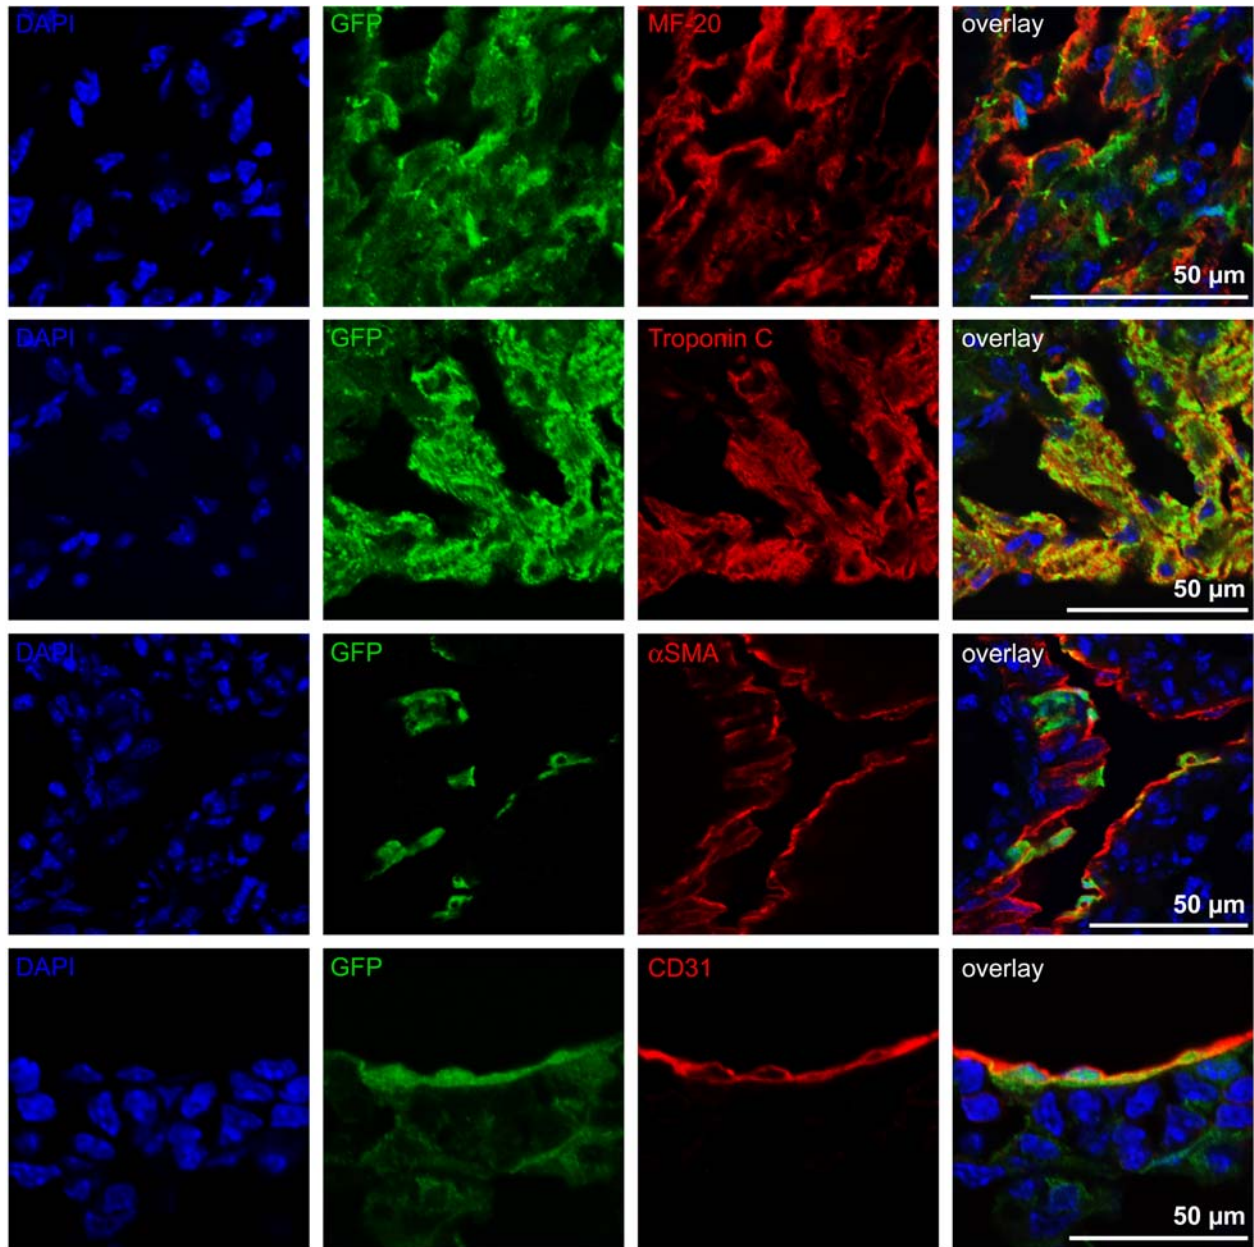

**Suppl. Fig. 2** *In vivo* developmental potential of 2D4 iPS cells. Immunofluorescence staining shows GFP-expressing 2D4 iPS cells (green) that contribute *in vivo* to cells of the cardiovascular lineage including cardiomyocytes (sarcomeric myosin (MF-20) and Troponin C staining (red)), smooth muscle cells (αSMA staining (red)), and endothelial cells (CD31 staining (red)). DAPI-staining was performed to show cell nuclei (blue). Scale bars equal 50 μm.

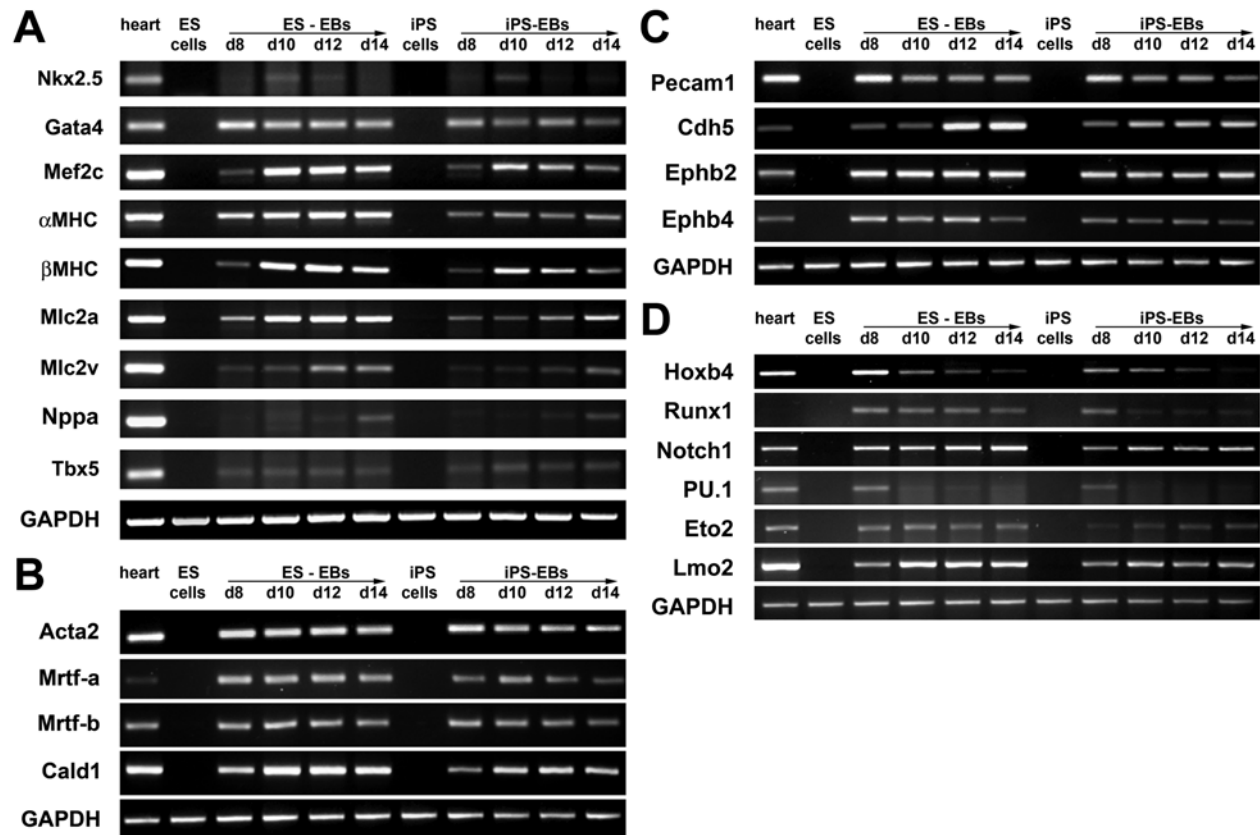

**Suppl. Fig. 3** Cardiovascular and hematopoietic gene expression in ES and iPS cell-derived EBs. Semi-quantitative RT-PCR analysis shows the upregulation of (A) cardiac, (B) smooth muscle, (C) endothelial and (D) hematopoietic cell markers.

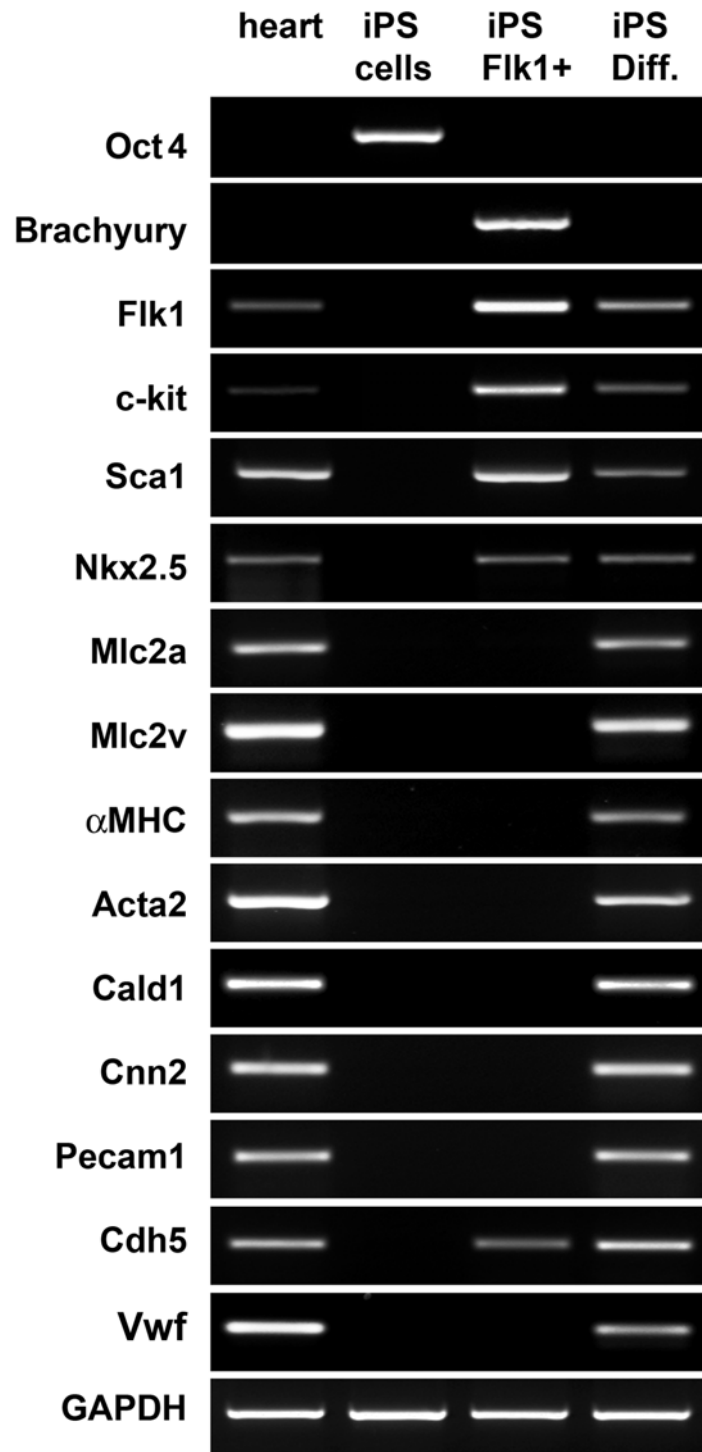

**Suppl. Fig. 4** RT-PCR analysis shows mRNA expression profiles of heart tissue, undifferentiated iPS cells, MACS-isolated iPS cell-derived Flk1-positive progenitor cells, and differentiated Flk1-positive cells after 12 days of culture in alpha-MEM, PDFG-BB and VEGF medium (pooled samples).

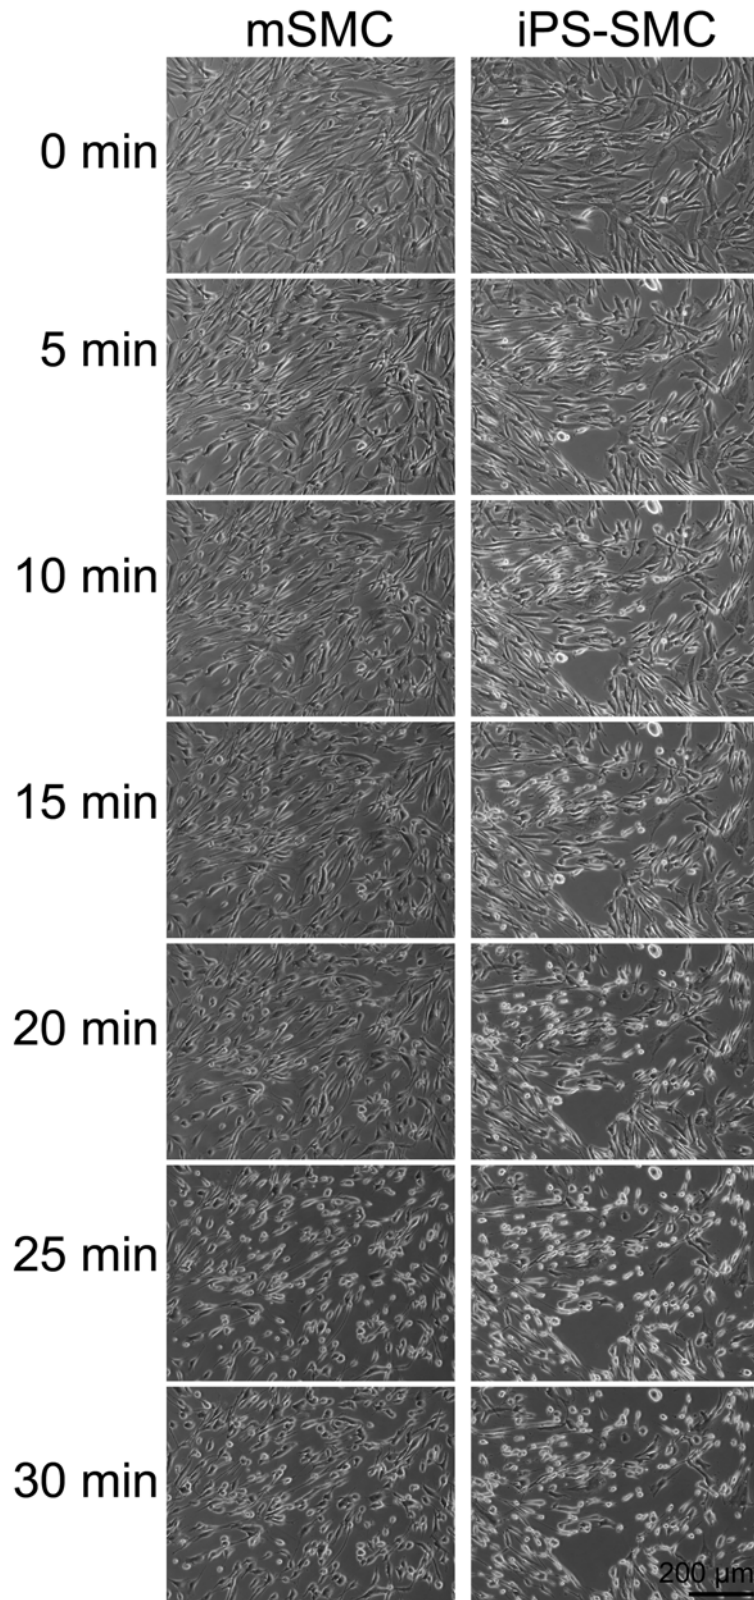

**Suppl. Fig. 5** After exposure to  $10^{-5}$  M carbachol for 30 minutes, mSMC and iPS-SMC contracted between  $66.9 \pm 3.4\%$  and  $71.1 \pm 2.4\%$ . Scale bar equals 200  $\mu\text{m}$ .

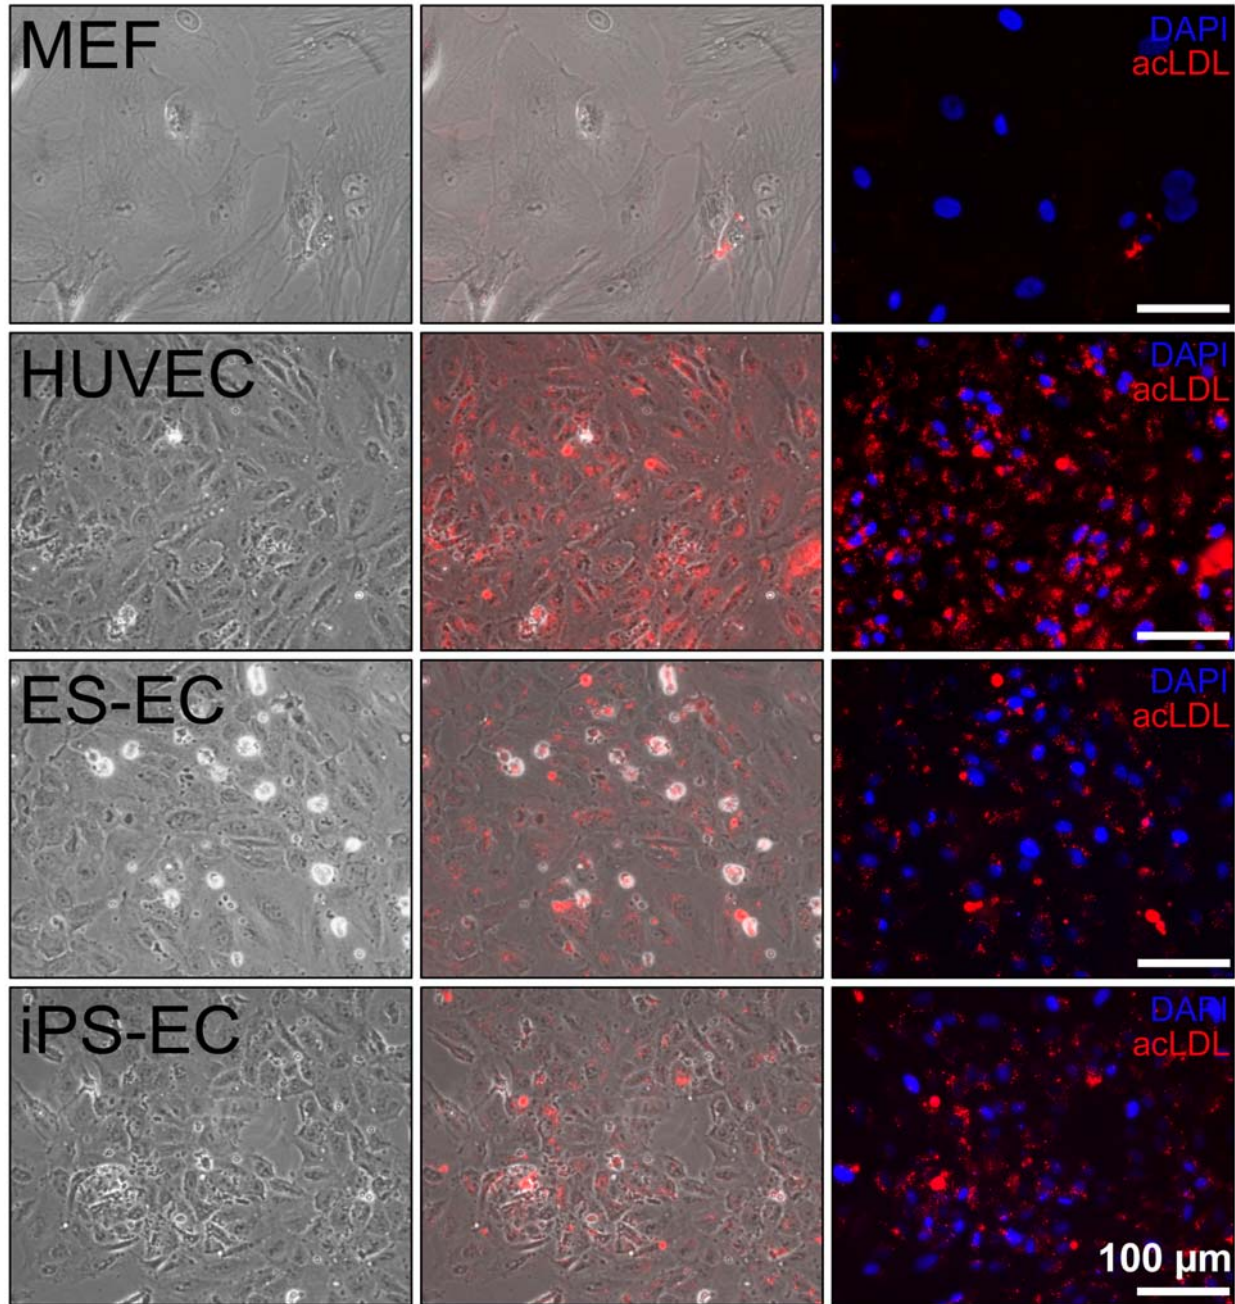

**Suppl. Fig. 6** In contrast to murine embryonic fibroblasts (MEF), human umbilical vein endothelial cells (HUVEC), ES cell-derived EC (ES-EC) and iPS cell-derived EC (iPS-EC) display a typical cobblestone morphology and have the ability to uptake acetylated low-density lipoprotein (acLDL; red). DAPI-staining was performed to show cell nuclei (blue). Scale bars equal 100 μm.

## **Supplemental Tables**

**Supplemental Table 1.** Primer sets used for RT-PCR.

| Gene         | Primer Sequences                                                     | AT in °C | Cycles | Reference |
|--------------|----------------------------------------------------------------------|----------|--------|-----------|
| Oct3/4       | F5'-agcacgagtggaagcact-3'<br>R5'-ctcattgtgtcggcttcct-3'              | 58       | 36     | *         |
| Nanog        | F5'-agggtctcgtactgagatgctctg-3'<br>R5'-caaccactggttttctgccaccg-3'    | 55       | 35     | *         |
| Brachyury    | F5'-aatgggggtggctgttcct-3'<br>R5'-aggctttgggcccgtgcata-3'            | 65       | 38     | 1         |
| Scf/Tal1     | F5'-attgcacacacgggattctg-3'<br>R5'-catacagtacgacactgacg-3'           | 58       | 38     | *         |
| Flk1         | F5'-tctgtggttctgcgtggaga-3'<br>R5'-gtatcattccaaccacc-3'              | 57       | 38     | *         |
| Flt1         | F5'-tgtggagaaacttggtgacct-3'<br>R5'-tggaacacagcaggactcct-3'          | 65       | 36     | *         |
| Tie2         | F5'-aagacatacgtgaacaccacact-3'<br>R5'-actctagagtcagaacacactgcagat-3' | 53       | 34     | *         |
| Gata1        | F5'-cattggccccttgtagggccag-3'<br>R5'-cgctccagccagattcgacc-3'         | 65       | 36     | *         |
| c-kit        | F5'-ccatgtggctaaagatgaac-3'<br>R5'-ctgctggtgctcgggtttg-3'            | 56       | 34     | *         |
| Sca1         | F5'-tctgaggatggacacttctc-3'<br>R5'-ctcaggctgaacagaagcac-3'           | 56       | 34     | *         |
| Isl1         | F5'-agatatgggagacatgggcat-3'<br>R5'-acacagcggaaacactcgatg-3'         | 65       | 36     | *         |
| Nkx2.5       | F5'-caagtgtctcctgcttcc-3'<br>R5'-ggctttgtccagctccact-3'              | 60       | 38     | *         |
| Gata4        | F5'-tctcactatgggcacagcag-3'<br>R5'-gcgatgtctgagtgcagga-3'            | 60       | 32     | *         |
| Mef2c        | F5'-agggtgtgctcaagtacaccgagt-3'<br>R5'-atctcaaagctgggaggtggaaca-3'   | 65       | 32     | *         |
| $\alpha$ MHC | F5'-ctgctggagaggttattcctcg-3'<br>R5'-ggaagagtgcgcgcacatcaagg-3'      | 68       | 34     | *         |
| $\beta$ MHC  | F5'-tgcaaaggctccaggctgagggc-3'<br>R5'-gccaacaccaacctgtccaagttc-3'    | 68       | 36     | *         |

|        |                                                                         |    |    |   |
|--------|-------------------------------------------------------------------------|----|----|---|
| Mlc2a  | F5'-cagacctgaaggagacct-3'<br>R5'-gtcagcgtaaacagttgc-3'                  | 54 | 36 | * |
| Mlc2v  | F5'-tgtgggtcacctgaggctgtggtcag-3'<br>R5'-gaaggctgactatgtgccgggagatgc-3' | 68 | 36 | * |
| Nppa   | F5'-tgatagatgaaggcaggaagccgc-3'<br>R5'-aggattggagcccagagtggactagg-3'    | 68 | 36 | * |
| Tbx5   | F5'-ggagcctgattccaaagaca-3'<br>R5'-ttcagccacagttcacgttc-3'              | 60 | 38 | * |
| Mrtf-a | F5'-ttgtcccagcctggttctcca-3'<br>R5'-atctgctgaaatctctccactctg-3'         | 60 | 38 | * |
| Mrtf-b | F5'-ccccagcagttgtgttcagcactctt-3'<br>R5'-gatgctggctgtcactggttcatcttg-3' | 60 | 38 | * |
| Ephb2  | F5'-tccaggagggactctgttggaag-3'<br>R5'-cggggtattctccttctaattgt-3'        | 65 | 36 | * |
| Ephb4  | F5'-cccaaataaggagacgagtc-3'<br>R5'-ctcaaaaggaggtgtccag-3'               | 62 | 36 | * |
| Hoxb4  | F5'-ggagttcactacaaccgctacctg-3'<br>R5'-ctaccccccttctctgtgtttattc-3'     | 65 | 36 | * |
| Runx1  | F5'-ccagcaagctgaggagcgcg-3'<br>R5'-ccgacaaacctgaggtcgttg-3'             | 65 | 36 | * |
| Notch1 | F5'-gcagccacagaactaccactccag-3'<br>R5'-taaatacctctggaatgtgggtgat-3'     | 65 | 36 | * |
| PU.1   | F5'-atggaagggtttccctcaccgcc-3'<br>R5'-gtccacgctctgcagctctgtgaa-3'       | 65 | 36 | * |
| Eto2   | F5'-acggcctcgctctccac-3'<br>R5'-ggtgcaggaccgcttactg-3'                  | 60 | 35 | * |
| Lmo2   | F5'-atgtcctcggccatcgaaagg-3'<br>R5'-agatgatccattgatcttgg-3'             | 60 | 35 | * |
| Nes    | F5'-ccctcaccactctatttta-3'<br>R5'-actatctaaacctttaggagaa-3'             | 58 | 36 | * |
| Afp    | F5'-tcgtattccaacaggagg-3'<br>R5'-aggctttgtctcaccag-3'                   | 54 | 36 | * |
| GFP    | F5'-tgttctgctggtagtggtcg-3'<br>R5'-tatatcatggccgacaagca-3'              | 55 | 36 | * |
| GAPDH  | F5'-gcaaattcaacggcac-3'<br>R5'-gatgaccggttggct-3'                       | 60 | 32 | 1 |

---

\*DNA sequence for this gene was obtained from the GenBank database (<http://www.ncbi.nlm.nih.gov>). The PCR primers were designed using OligoPerfect™ Designer (Invitrogen).

## References

1. Schenke-Layland K, Angelis E, Rhodes KE, et al. Collagen IV induces trophoectoderm differentiation of mouse embryonic stem cells. *Stem Cells* 2007;25:1529-1538.

**Supplemental Table 2.** Morphometric analysis of ES and iPS cell-derived EBs. The cross-sectional area was measured for at least 50 ES and iPS cell-derived EBs. For statistical analysis all data are presented as mean EB size in  $\mu\text{m} \pm \text{SEM}$ . Statistical significance was assessed by Student's *t* test. *P*-values less than 0.05 were defined as statistically significant.

|                       | d2              | d4              | d6             | d8             | d10            | d12            | d14            |
|-----------------------|-----------------|-----------------|----------------|----------------|----------------|----------------|----------------|
| <b>ES-EBs</b>         | (254 $\pm$ 8.6) | (301 $\pm$ 12)  | (377 $\pm$ 15) | (415 $\pm$ 14) | (434 $\pm$ 13) | (433 $\pm$ 13) | (452 $\pm$ 13) |
| <b>iPS-EBs</b>        | (184 $\pm$ 7.6) | (252 $\pm$ 9.5) | (403 $\pm$ 12) | (403 $\pm$ 12) | (410 $\pm$ 10) | (460 $\pm$ 12) | (476 $\pm$ 10) |
| <b><i>p</i>-value</b> | 0.0001          | 0.0007          | 0.0853         | 0.2667         | 0.0718         | 0.0632         | 0.0768         |
